# Supplementary material for: Epidemiological and ecological consequences of virus manipulation of host and vector in plant virus transmission
Source: PLOS journal article supplement (doi:10.1371/journal.pcbi.1009759), 2021-12-30
Supplement: S2 (10.1371/journal.pcbi.1009759.s002) [file journal.pcbi.1009759.s002]

## Appendix S2. Deriving the Basic Reproduction Number via the Next Generation Matrix approach

Focusing on the virus-carrying compartments in Equation (26) of the main text leads to

$$\begin{aligned}\frac{dI}{dt} &= \frac{\gamma Z S}{\omega_+ \Gamma(S + v_+ \epsilon_+ I)} - (\rho + \mu)I \\ \frac{dZ}{dt} &= \frac{\eta v_- X I}{\omega_- \Gamma(S + v_- \epsilon_- I)} - (\tau + \alpha_+)Z\end{aligned}$$

The disease-free equilibrium is  $(S, I, X, Z) = (N, 0, \kappa, 0)$ . Following the standard notation for Next Generation calculations [1], take the rates at which new infections are caused

$$F = \begin{pmatrix} \frac{\gamma Z S}{\omega_+ \Gamma(S + v_+ \epsilon_+ I)} \\ \frac{\eta v_- X I}{\omega_- \Gamma(S + v_- \epsilon_- I)} \end{pmatrix}$$

and the rates at which infections are removed

$$V = \begin{pmatrix} (\rho + \mu)I \\ (\tau + \alpha_+)Z \end{pmatrix}$$

The Jacobians of these matrices are

$$J_F = \begin{pmatrix} -\frac{\gamma Z S v_+ \epsilon_+}{\omega_+ \Gamma(S + v_+ \epsilon_+ I)^2} & \frac{\gamma S}{\omega_+ \Gamma(S + v_+ \epsilon_+ I)} \\ \frac{\eta v_- X S}{\omega_- \Gamma(S + v_- \epsilon_- I)^2} & 0 \end{pmatrix}$$

and

$$J_V = \begin{pmatrix} \rho + \mu & 0 \\ 0 & \tau + \alpha_+ \end{pmatrix}$$

Evaluating  $M = J_F J_V^{-1}$  at the disease-free equilibrium gives

$$M = \begin{pmatrix} 0 & \frac{\gamma}{\omega_+ \Gamma(\tau + \alpha_+)} \\ \frac{\eta v_- \kappa}{\omega_- \Gamma N(\rho + \mu)} & 0 \end{pmatrix}$$

The basic reproduction number,  $R_0$ , is then the spectral radius of the matrix  $M$ , i.e.

$$R_0 = \sqrt{\frac{\gamma \eta v_- \kappa}{\omega_- \omega_+ \Gamma^2 N(\tau + \alpha_+)(\rho + \mu)}}$$

which matches the result given in Equation (36) of the main text.

### Reference

- [1] van den Driessche, P. (2017) Reproduction numbers of infectious disease models. *Infectious Disease Modelling*. 2:288-303.
